# Supplementary material for: A Putative Lignin Copper Oxidase from Trichoderma reesei
Source: MDPI journal article supplement (doi:10.3390/jof7080643), 2021-08-07

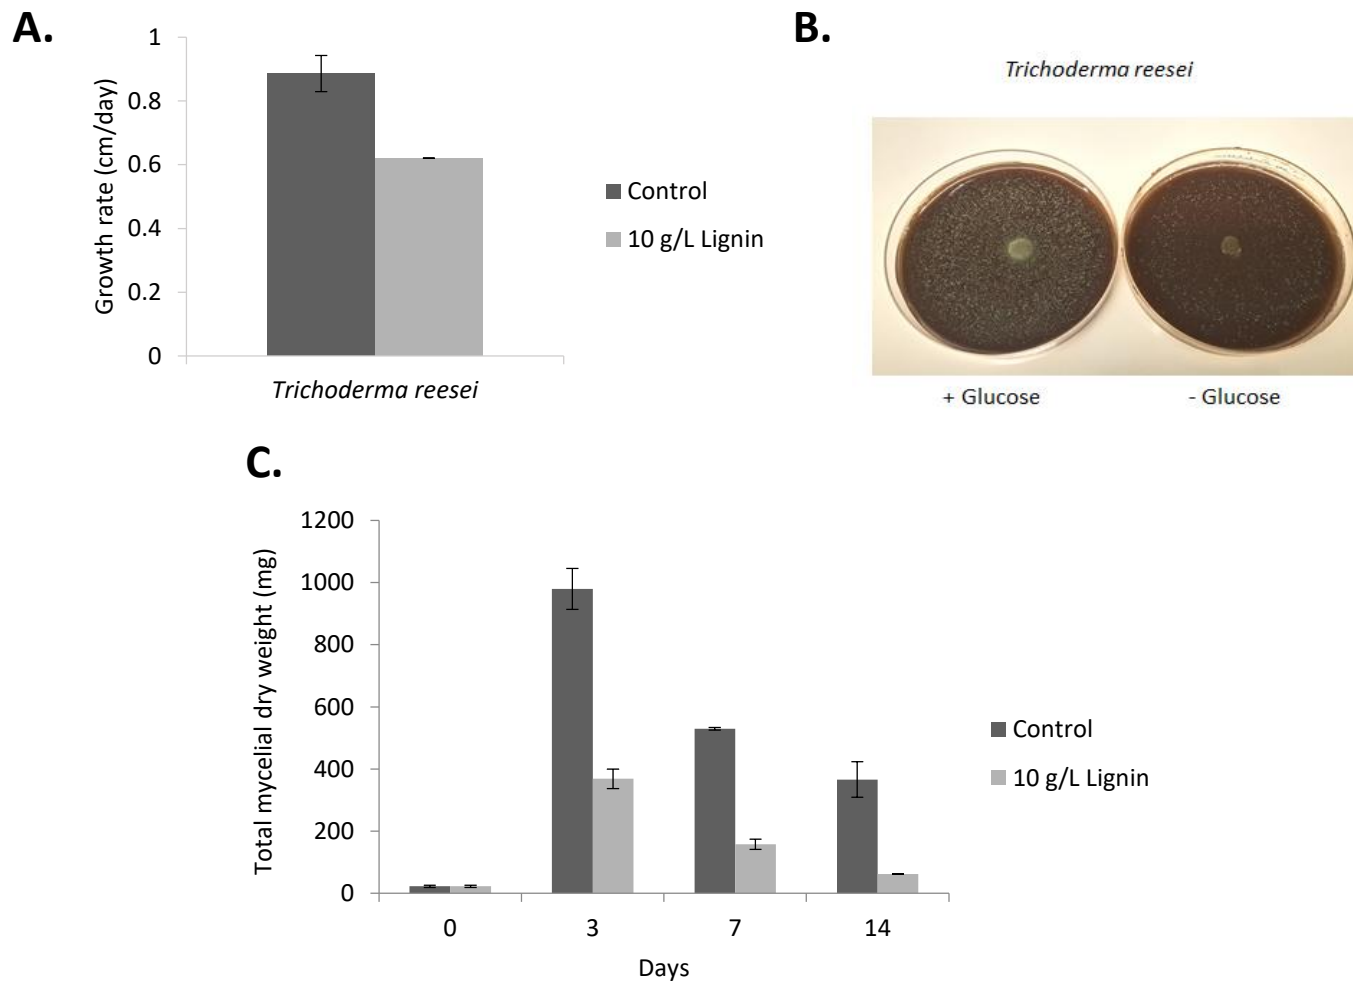

**Figure S1. *T. reesei* growth on technical soda lignin.** **A.** Growth rate of *T. reesei* on agar plates containing technical lignin in the presence and absence of 1 g/L glucose and **B.** mycelial appearance. **C.** Total mycelial dry weight of *T. reesei* during growth in liquid cultures on lignin in the presence and absence of 2.5 g/L maltose.

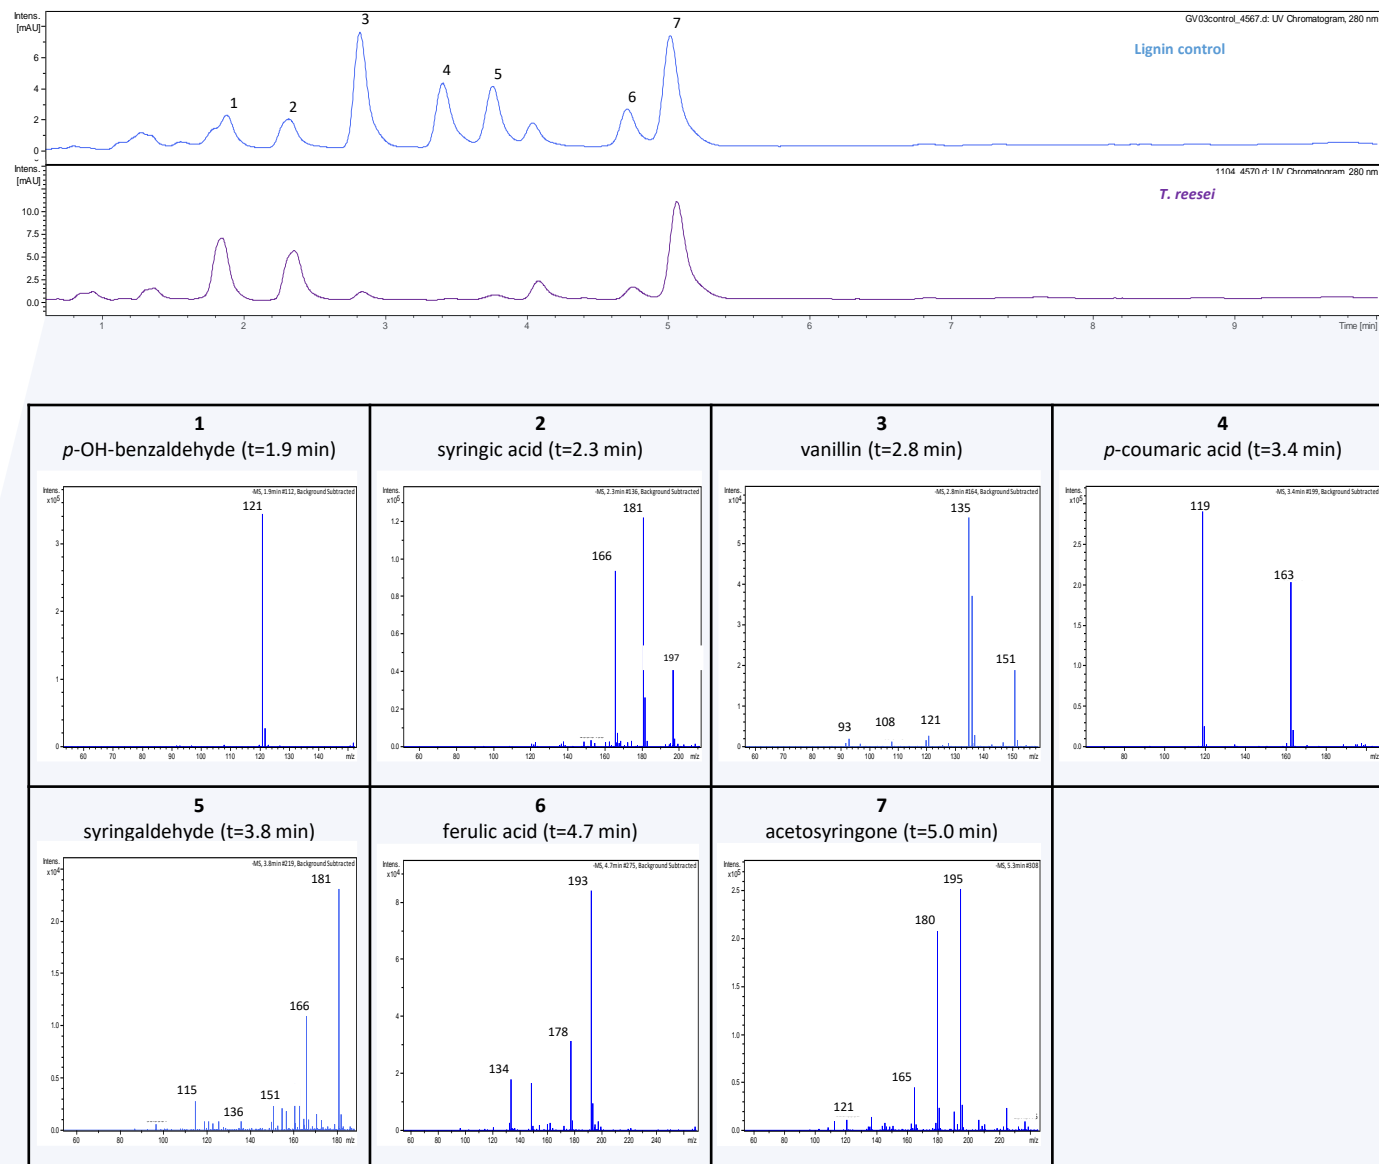

**Figure S2. LC-MS analysis on water-soluble lignin fraction.** The analysis is done on phenolic monomers extracted from the culture supernatant by ethyl acetate. Normalized chromatograms obtained with a C18 column (Highpurity, Thermo Electron Corporation, 2.7  $\mu$ m, 50 mm x 2 mm I.D.mm), a 5–100 vol.% aqueous acetonitrile, 1% HCOOH gradient (30min) and 0.4 ml/min flow rate, and with a 280 nm UV detection. ESI-MS spectra were obtained in the negative mode from scans acquired in a mass range of  $m/z$  120–2000.

**Table S1. Total phenolic and thioacidolysis yields of water-insoluble residual lignin after exposure to *T. reesei*.**

|                  | PheOH<br>(mmol g <sup>-1</sup> ) <sup>a</sup> | Thioacidolysis <sup>b</sup>         |             |
|------------------|-----------------------------------------------|-------------------------------------|-------------|
|                  |                                               | Total yield (μmol g <sup>-1</sup> ) | S/G ratio   |
| Control          | 2.90                                          | 132 ± 9                             | 0.93 ± 0.05 |
| <i>T. reesei</i> | 2.80                                          | 89 ± 3                              | 0.92 ± 0.00 |

<sup>a</sup> Data correspond to single determination  
<sup>b</sup> Data are mean values (± standard error) between duplicate analyses.

**Table S2.** Identified CAZymes in the secretomes during growth of *T. reesei* on technical lignin.

| Protein ID    | Cazy         | Day of growth      | Protein ID | Cazy             | Day of growth |
|---------------|--------------|--------------------|------------|------------------|---------------|
| 22915         | AA3_2        | 7                  | 69276      | GH30_7           | 7 and 14      |
| 80659         | AA3_3        | 14                 | 82235      | GH31             | 3, 7 and 14   |
| <b>124282</b> | <b>AA5_1</b> | <b>3, 7 and 14</b> | 80240      | GH35             | 3, 7 and 14   |
| 78357         | AA6          | 7 and 14           | 124016     | GH36             | 3, 7 and 14   |
| 73643*        | AA9-CBM1     | 7                  | 123226     | GH37             | 3, 7 and 14   |
| 77299         | GH2          | 3, 7 and 14        | 3196       | GH38             | 14            |
| 69245         | GH2          | 3, 7 and 14        | 68064      | GH43             | 7             |
| 62166*        | GH2          | 7                  | 45717      | GH47             | 3, 7 and 14   |
| 58450         | GH3          | 3, 7 and 14        | 55319      | GH54-CBM42       | 3, 7 and 14   |
| 121735        | GH3          | 3, 7 and 14        | 123283     | GH54-CBM42       | 3, 7 and 14   |
| 121127        | GH3          | 3, 7 and 14        | 121746     | GH55             | 3, 7 and 14   |
| 47268         | GH3          | 7                  | 54242      | GH55             | 3, 7 and 14   |
| 76672         | GH3          | 7 and 14           | 70845      | GH55             | 3, 7 and 14   |
| 104797        | GH3          | 7 and 14           | 73248      | GH55             | 3, 7 and 14   |
| 82616*        | GH5_5        | 7                  | 76210      | GH62             | 3, 7 and 14   |
| 120312        | CBM1-GH5_5   | 7                  | 124175     | GH64             | 3, 7 and 14   |
| 56996         | GH5_7        | 7                  | 123456     | GH65-CBM32       | 3, 7 and 14   |
| 72567         | CBM1-GH6     | 7 and 14           | 72526      | GH67             | 3, 7 and 14   |
| 123989        | GH7-CBM1     | 3, 7 and 14        | 71532      | GH71             | 3, 7 and 14   |
| 122081        | GH7-CBM1     | 7 and 14           | 108672     | GH71-CBM24-CBM24 | 3, 7 and 14   |
| 120229*       | GH10         | 7                  | 120873     | GH71-CBM24-CBM24 | 3, 7 and 14   |
| 74223         | GH11         | 7 and 14           | 123538*    | GH72             | 7             |
| 123818        | GH11         | 3, 7 and 14        | 22914      | GH72-CBM43       | 3, 7 and 14   |
| 123232*       | GH12         | 7                  | 82633      | GH72-CBM43       | 3, 7 and 14   |
| 105956        | GH13_1       | 3, 7 and 14        | 49081      | GH74-CBM1        | 3, 7 and 14   |
| 1885          | GH15-CBM20   | 3, 7 and 14        | 70341*     | GH75             | 7             |
| 65406         | GH16         | 3, 7 and 14        | 74807*     | GH76             | 7 and 14      |
| 123726        | GH16         | 3, 7 and 14        | 27395      | GH76             | 7             |
| 49274         | GH16         | 3, 7 and 14        | 67844*     | GH76             | 7             |
| 39755         | GH16         | 7                  | 106575     | GH79             | 3, 7 and 14   |
| 76266*        | CBM18-GH16   | 7                  | 71394      | GH79             | 7             |
| 66792         | GH17         | 3, 7 and 14        | 57098      | GH92             | 3, 7 and 14   |
| 39942         | GH17         | 3, 7 and 14        | 55733      | GH92             | 3, 7 and 14   |
| 80833         | GH18         | 3, 7 and 14        | 60635      | GH92             | 7 and 14      |
| 119859        | GH18         | 7 and 14           | 79921*     | GH92             | 7             |
| 68347         | GH18-CBM1    | 7 and 14           | 58802      | GH95             | 3, 7 and 14   |
| 21725         | GH20         | 3, 7 and 14        | 111138*    | GH95             | 7             |
| 23346         | GH20         | 7                  | 5807*      | GH95             | 7             |
| 103458        | GH25         | 7                  | 79606      | GH115            | 7 and 14      |
| 72632         | GH27         | 3, 7 and 14        | 70373      | GH125            | 7 and 14      |
| 59391         | GH27         | 3, 7 and 14        | 107850     | CE1              | 7             |
| 27259*        | GH27         | 7                  | 44214      | CE5              | 3, 7 and 14   |
| 122780        | GH28         | 3, 7 and 14        | 73632*     | CE5-CBM1         | 3 and 7       |
| 103049        | GH28         | 7 and 14           | 58282      | CE9              | 14            |
| 3094          | GH30_3       | 3, 7 and 14        | 121418     | CE16             | 3, 7 and 14   |
| 69736         | GH30_3       | 7 and 14           | 103033     | PL7_4            | 7             |
| 110894        | GH30_5       | 3, 7 and 14        | 69189*     | PL20             | 7             |
| 111849        | GH30_7       | 3, 7 and 14        |            |                  |               |

\*proteins that were exclusively detected in the absence of maltose.

|                                |     |                                                                               |                                                               |                                    |                                             |                                |                                |                                      |
|--------------------------------|-----|-------------------------------------------------------------------------------|---------------------------------------------------------------|------------------------------------|---------------------------------------------|--------------------------------|--------------------------------|--------------------------------------|
| EFQ36699.1 CgrAAO/276-776      | 276 | QNGQWSP I Q . . . . .                                                         | TLPLNP . . . . .                                              | VAAYLVPAYPVVQDFLSFSFSPFT . . . . . | GGGPAYNTAFMRYNIKSSAASQFNVAETKDHMF . . . . . | PGMNHLDAGR . . . . .           | LVINGGNTD . . . . .            | AAV 373                              |
| CAP96757.1 PruROX/154-636      | 154 | NGGVWGP T I . . . . .                                                         | DLPVVA . . . . .                                              | VSQAV I PETN . . . . .             | EVLV . . . . .                              | WSSWAKDD . . . . .             | LHSRGYT . . . . .              | LTAVWMNMDSNVSTQRKVQETHHDMF . . . . . |
| EFQ27661.1 CgrAAO/B4-574       | 84  | VKGKWG D L I . . . . .                                                        | RLPVI P . . . . .                                             | VAAIYVPSYPEPSRLFFSSWSNDA . . . . . | FSQASGMT . . . . .                          | QFGDYDFATGAI . . . . .         | SQRTVTNTTHHDMF . . . . .       | PG I SQLEDGR . . . . .               |
| EFQ30446.1 CgrAlcOx/2-482      | 2   | NVGKWG PMV . . . . .                                                          | KFPVVP . . . . .                                              | VAVALVPETG . . . . .               | NLLVWSGWPNRW . . . . .                      | TAGNGKT . . . . .              | YTSLYNVNTGNI . . . . .         | ISDAI VQNTQHDMF . . . . .            |
| ELA25906.1 CfrAlcOx/2-482      | 2   | LGQWSP L I . . . . .                                                          | KFPVVP . . . . .                                              | VSVALPESG . . . . .                | NLLVWSGWPNRW . . . . .                      | TAGNGKT . . . . .              | YTSLYNVQGTGVNSDAV . . . . .    | QNTQHDMF . . . . .                   |
| <i>Tr. reesei</i> L_Ox/154-693 | 154 | GVGNWTSRLTTFYFWTGPFFYSWDFPAAGTAAAGSYEQLIGGVCILPMTTQSITGKVTFLEKWTGTE . . . . . | PNSTGAYE . . . . .                                            | LDLSLVNQYLAWREMHV . . . . .        | KTDIF . . . . .                             | AGGVTLDPDKAGRLTVGGWS . . . . . | GDSITYGV . . . . .             | 279                                  |
| XP_013949912 TrGLOX/103-621    | 103 | HVG . . . . .                                                                 | GTFPYSWSFPEAGTAAAGSYEQLIGGVCILPMTTQSITGKVTFLEKWTGTE . . . . . | PNSTGAYE . . . . .                 | LDLSLVNQYLAWREMHV . . . . .                 | KTDIF . . . . .                | AGGVTLDPDKAGRLTVGGWS . . . . . | GDSITYGV . . . . .                   |
| CAD79488.1 JmeaGLOX/1-605      | 1   | . . . . .                                                                     | ASKAG . . . . .                                               | SYEVVNTNS . . . . .                | L . . . . .                                 | ASAMMLGLMBEDNVF . . . . .      | ILDKAENNS . . . . .            | ARLADGRH . . . . .                   |
| AAAR7595.1 JPhuGLOX/1-537      | 1   | . . . . .                                                                     | APGWRFLDKPNLS . . . . .                                       | . . . . .                          | G . . . . .                                 | IVALEAIVNSSLV . . . . .        | IFDRATGDD . . . . .            | PLKINGES . . . . .                   |
| ANJ20632.1 JTrGLOX/1-538       | 1   | . . . . .                                                                     | APSAPQWRF . . . . .                                           | DLKKAERS . . . . .                 | G . . . . .                                 | IVALESIVVSP . . . . .          | TLVLFVDRAS . . . . .           | DDQLINNH . . . . .                   |
| QCC62349.1 JTrGLOX/31-538      | 1   | . . . . .                                                                     | APSAPQWRF . . . . .                                           | DLKKAERS . . . . .                 | G . . . . .                                 | IVALESIVVSP . . . . .          | TLVLFVDRAS . . . . .           | DDQLINNH . . . . .                   |
| ANJ20633.1 JTrGLOX/21-539      | 1   | . . . . .                                                                     | APSTPTGQWFLNKAERS . . . . .                                   | . . . . .                          | G . . . . .                                 | IVALESIVVSP . . . . .          | TLVLFVDRAT . . . . .           | NDLQINNH . . . . .                   |
| EFQ36699.1 CgrAAO/276-776      | 374 | TIDYDF . . . . .                                                              | ANTWTRAA . . . . .                                            | MNMGRG . . . . .                   | YQSSVTLSDGRGFTIGGS . . . . .                | TGGIGGQNGTPMKNGEYVDP . . . . . | KLNKWTALPGALVAPML . . . . .    | TTYD . . . . .                       |
| CAP96757.1 PruROX/154-636      | 247 | SIDPA . . . . .                                                               | SGKWTEGNT . . . . .                                           | MIIITRGV . . . . .                 | QASATIDAGRVFIIGGS . . . . .                 | NGGNT . . . . .                | YDKDGEIYDP . . . . .           | DTEKYSTLKNALVRPMW . . . . .          |
| EFQ27661.1 CgrAAO/B4-574       | 180 | SIYDPA . . . . .                                                              | THEFTRGPN . . . . .                                           | MTLARG . . . . .                   | YQTSCTLSNGKVFITIGGA . . . . .               | SGE . . . . .                  | R . . . . .                    | VGNKGEYVDP . . . . .                 |
| EFQ30446.1 CgrAlcOx/2-482      | 96  | SVLDFKKGESSFWTFLSN . . . . .                                                  | . . . . .                                                     | MQISLRG . . . . .                  | QSSCTTSEGIKFIIVIGGS . . . . .               | SGA . . . . .                  | G . . . . .                    | TRNGEYVDP . . . . .                  |
| ELA25906.1 CfrAlcOx/2-482      | 96  | SVLDFKKGESSFWTFLSN . . . . .                                                  | . . . . .                                                     | MQISLRG . . . . .                  | QSSCTTSEGIKFIIVIGGS . . . . .               | SGA . . . . .                  | G . . . . .                    | TRNGEYVDP . . . . .                  |
| <i>Tr. reesei</i> L_Ox/154-693 | 280 | RLYTFD . . . . .                                                              | GSAGVNGTNDWGENV . . . . .                                     | ILKLGNGRW . . . . .                | PTAMMNAKNSVLVIGGS . . . . .                 | SGS . . . . .                  | NSAPVPTLE . . . . .            | ILPFTGTAPLY . . . . .                |
| XP_013949912 TrGLOX/103-621    | 216 | RLYTFD . . . . .                                                              | GSAGVNGTNDWGENV . . . . .                                     | ILKLGNGRW . . . . .                | PTAMMNAKNSVLVIGGS . . . . .                 | SGS . . . . .                  | NSAPVPTLE . . . . .            | ILPFTGTAPLY . . . . .                |
| CAD79488.1 JmeaGLOX/1-605      | 115 | RLLEPN . . . . .                                                              | SQTWIDSPST . . . . .                                          | TVAAQVMLOQPRW . . . . .            | PIEVLDEGSDVIFIGGA . . . . .                 | SGGYI . . . . .                | NRNPTPTDPLQNGQANPT . . . . .   | TYEYF . . . . .                      |
| AAAR7595.1 JPhuGLOX/1-537      | 105 | RIFEP . . . . .                                                               | ASPSGDDCTLF . . . . .                                         | EDPATVHLLERW . . . . .             | PSSVIRIFDQSLMIIIGGS . . . . .               | HYL . . . . .                  | NPDPANSFEFF . . . . .          | PPSKEQTPRP . . . . .                 |
| ANJ20632.1 JTrGLOX/1-538       | 107 | RIFEP . . . . .                                                               | ASPSGDDCTVF . . . . .                                         | EDPOTHLLEDRW . . . . .             | PSSVIRIFDQSLMIIIGGS . . . . .               | HYL . . . . .                  | NPDPANSFEFF . . . . .          | PPSKEQTPRP . . . . .                 |
| QCC62349.1 JTrGLOX/31-538      | 107 | RLFEP . . . . .                                                               | ASPSGDDCTLF . . . . .                                         | EDPATVHLLERW . . . . .             | PSSVIRIFDQSLMIIIGGS . . . . .               | HYL . . . . .                  | NPDPANSFEFF . . . . .          | PPSKEQTPRP . . . . .                 |
| ANJ20633.1 JTrGLOX/21-539      | 108 | RLFEP . . . . .                                                               | ASPSGDDCTLF . . . . .                                         | EDPVTLLHLEKRW . . . . .            | PSSVIRIFDQSLMIIIGGS . . . . .               | HYL . . . . .                  | NPDPANSFEFF . . . . .          | PPSKEQTPRP . . . . .                 |
| EFQ36699.1 CgrAAO/276-776      | 488 | AQR . . . . .                                                                 | . . . . .                                                     | NTQNDGM . . . . .                  | GVTVMYDS . . . . .                          | GKIFAGGAGS . . . . .           | YSD . . . . .                  | BDKALYA . . . . .                    |
| CAP96757.1 PruROX/154-636      | 396 | TELYDPKTNQ . . . . .                                                          | . . . . .                                                     | ANEQSPNSIVR . . . . .              | YHSGISLLLPDGRVFN . . . . .                  | GGSGGL . . . . .               | . . . . .                      | GVSAPTNHFD . . . . .                 |
| EFQ27661.1 CgrAAO/B4-574       | 297 | AATR . . . . .                                                                | . . . . .                                                     | RVYPASAAATMAL . . . . .            | PLTPQNYQTITILF . . . . .                    | GGSVMSQDMQWNGYS . . . . .      | SGPGGN . . . . .               | ILGLQASDDCS . . . . .                |
| EFQ30446.1 CgrAlcOx/2-482      | 212 | AGLR . . . . .                                                                | . . . . .                                                     | GTDEDSMG . . . . .                 | GVSMYMDA . . . . .                          | AVAGKIF . . . . .              | TYGGGKG . . . . .              | YV . . . . .                         |
| ELA25906.1 CfrAlcOx/2-482      | 212 | AGLR . . . . .                                                                | . . . . .                                                     | GTDEDSMG . . . . .                 | GVSMYMDA . . . . .                          | AVAGKIF . . . . .              | TYGGGKG . . . . .              | YV . . . . .                         |
| <i>Tr. reesei</i> L_Ox/154-693 | 402 | GVANRDLGGRTYPLGTA . . . . .                                                   | AVLLPMAHPT . . . . .                                          | TEPLNLVIL . . . . .                | GGSSGEGAS . . . . .                         | . . . . .                      | . . . . .                      | NAIDNCVSTY . . . . .                 |
| XP_013949912 TrGLOX/103-621    | 338 | GVNDPLGGRTYPLGTA . . . . .                                                    | AVLLPMAHPT . . . . .                                          | TEPLNLVIL . . . . .                | GGSSGEGAS . . . . .                         | . . . . .                      | . . . . .                      | NAIDNCVSTY . . . . .                 |
| CAD79488.1 JmeaGLOX/1-605      | 260 | GVVV . . . . .                                                                | . . . . .                                                     | RVYPASAAATMAL . . . . .            | PLTPQNYQTITILF . . . . .                    | GGSVMSQDMQWNGYS . . . . .      | SGPGGN . . . . .               | ILGLQASDDCS . . . . .                |
| AAAR7595.1 JPhuGLOX/1-537      | 229 | NGVR . . . . .                                                                | . . . . .                                                     | VTNPI . . . . .                    | DGSAILLPLSP . . . . .                       | DFIPEVLV . . . . .             | GGSTADTSLP . . . . .           | ST . . . . .                         |
| ANJ20632.1 JTrGLOX/1-538       | 231 | NVNR . . . . .                                                                | . . . . .                                                     | VTNPI . . . . .                    | DGSAILLPLSP . . . . .                       | DFIPEVLV . . . . .             | GGSTADTSLP . . . . .           | ST . . . . .                         |
| QCC62349.1 JTrGLOX/31-538      | 231 | NVNR . . . . .                                                                | . . . . .                                                     | VTNPI . . . . .                    | DGSAILLPLSP . . . . .                       | DFIPEVLV . . . . .             | GGSTADTSLP . . . . .           | ST . . . . .                         |
| ANJ20633.1 JTrGLOX/21-539      | 232 | NVNR . . . . .                                                                | . . . . .                                                     | VTNPI . . . . .                    | DGSAILLPLSP . . . . .                       | DFIPEVLV . . . . .             | GGSTADTSLP . . . . .           | ST . . . . .                         |
| EFQ36699.1 CgrAAO/276-776      | 595 | QAEVYDPVANT . . . . .                                                         | . . . . .                                                     | FTPVAAALAVPR . . . . .             | YHSGTGLLLPDGRVFM . . . . .                  | GGGGLCVYGG . . . . .           | . . . . .                      | GC . . . . .                         |
| CAP96757.1 PruROX/154-636      | 469 | TELYDPKTNQ . . . . .                                                          | . . . . .                                                     | ANEQSPNSIVR . . . . .              | YHSGTGLLLPDGRVFM . . . . .                  | GGGGLCVYGG . . . . .           | . . . . .                      | GC . . . . .                         |
| EFQ27661.1 CgrAAO/B4-574       | 395 | VAELFNPE . . . . .                                                            | TE . . . . .                                                  | WKQMAPMAVPR . . . . .              | YHSGTGLLLPDGRVFM . . . . .                  | GGGGLCVYGG . . . . .           | . . . . .                      | GC . . . . .                         |
| EFQ30446.1 CgrAlcOx/2-482      | 311 | TELYDPKTNQ . . . . .                                                          | . . . . .                                                     | ANEQSPNSIVR . . . . .              | YHSGTGLLLPDGRVFM . . . . .                  | GGGGLCVYGG . . . . .           | . . . . .                      | GC . . . . .                         |
| ELA25906.1 CfrAlcOx/2-482      | 311 | TELYDPKTNQ . . . . .                                                          | . . . . .                                                     | ANEQSPNSIVR . . . . .              | YHSGTGLLLPDGRVFM . . . . .                  | GGGGLCVYGG . . . . .           | . . . . .                      | GC . . . . .                         |
| <i>Tr. reesei</i> L_Ox/154-693 | 507 | NALLYDPAKPLGSRITV . . . . .                                                   | . . . . .                                                     | MANITV . . . . .                   | YHSEAIJLLDGRVLYSG . . . . .                 | SDPPDDVN . . . . .             | . . . . .                      | PEEYRVET . . . . .                   |
| XP_013949912 TrGLOX/103-621    | 443 | NALLYDPAKPLGSRITV . . . . .                                                   | . . . . .                                                     | MANITV . . . . .                   | YHSEAIJLLDGRVLYSG . . . . .                 | SDPPDDVN . . . . .             | . . . . .                      | PEEYRVET . . . . .                   |
| CAD79488.1 JmeaGLOX/1-605      | 360 | VPVIYDPSKPRQRLS . . . . .                                                     | ANANKPSTIAR . . . . .                                         | YHSSAILLPDGSVMV . . . . .          | AGSNPHQDVALDMPT . . . . .                   | TGTPPO . . . . .               | AFNTIYEV . . . . .             | KEVWYPPY . . . . .                   |
| AAAR7595.1 JPhuGLOX/1-537      | 349 | TPSYLTPDAPL . . . . .                                                         | LGKRI . . . . .                                               | SNAGMPTTTP . . . . .               | YHSSVTLT . . . . .                          | TQQGNFF . . . . .              | IGGNNPNMFT . . . . .           | TP . . . . .                         |
| ANJ20632.1 JTrGLOX/1-538       | 350 | VPSYLTPDAPL . . . . .                                                         | LGKRI . . . . .                                               | SNAGMPTTTP . . . . .               | YHSSVTLT . . . . .                          | TQQGNFF . . . . .              | IGGNNPNMFT . . . . .           | TP . . . . .                         |
| QCC62349.1 JTrGLOX/31-538      | 350 | VPSYLTPDAPL . . . . .                                                         | LGKRI . . . . .                                               | SNAGMPTTTP . . . . .               | YHSSVTLT . . . . .                          | TQQGNFF . . . . .              | IGGNNPNMFT . . . . .           | TP . . . . .                         |
| ANJ20633.1 JTrGLOX/21-539      | 350 | VPSYLTPDAPL . . . . .                                                         | LGKRI . . . . .                                               | SNAGMPTTTP . . . . .               | YHSSVTLT . . . . .                          | TQQGNFF . . . . .              | IGGNNPNMFT . . . . .           | TP . . . . .                         |
| EFQ36699.1 CgrAAO/276-776      | 723 | QRRILPTVYSTN . . . . .                                                        | . . . . .                                                     | QNTVALSI . . . . .                 | . . . . .                                   | PNDNGV . . . . .               | VPVPPGF . . . . .              | WYFVAVAPSGVHS . . . . .              |
| CAP96757.1 PruROX/154-636      | 584 | QRRILPTVYSTN . . . . .                                                        | . . . . .                                                     | QNTVALSI . . . . .                 | . . . . .                                   | PNDNGV . . . . .               | VPVPPGF . . . . .              | WYFVAVAPSGVHS . . . . .              |
| EFQ27661.1 CgrAAO/B4-574       | 523 | QRRVPLNVTVS . . . . .                                                         | . . . . .                                                     | QNEYSATL . . . . .                 | . . . . .                                   | PDDYGL . . . . .               | ILLPGYYL . . . . .             | LVFVSTPQGT . . . . .                 |
| EFQ30446.1 CgrAlcOx/2-482      | 429 | QRRILPTVYSTN . . . . .                                                        | . . . . .                                                     | QNTVALSI . . . . .                 | . . . . .                                   | PNDNGV . . . . .               | VPVPPGF . . . . .              | WYFVAVAPSGVHS . . . . .              |
| ELA25906.1 CfrAlcOx/2-482      | 429 | QRRILPTVYSTN . . . . .                                                        | . . . . .                                                     | QNTVALSI . . . . .                 | . . . . .                                   | PNDNGV . . . . .               | VPVPPGF . . . . .              | WYFVAVAPSGVHS . . . . .              |
| <i>Tr. reesei</i> L_Ox/154-693 | 624 | ARTLFPALSGAGT . . . . .                                                       | . . . . .                                                     | TCITL . . . . .                    | . . . . .                                   | SPPSKPI . . . . .              | APPGVYGLY . . . . .            | ILLDGGI . . . . .                    |
| XP_013949912 TrGLOX/103-621    | 560 | ARTLFPALSGAGT . . . . .                                                       | . . . . .                                                     | TCITL . . . . .                    | . . . . .                                   | SPPSKPI . . . . .              | APPGVYGLY . . . . .            | ILLDGGI . . . . .                    |
| CAD79488.1 JmeaGLOX/1-605      | 527 | QRAYVLDY . . . . .                                                            | TYTVNDQASVTY . . . . .                                        | VMNPLPNT . . . . .                 | KAMNRL . . . . .                            | FPVPAF . . . . .               | YV . . . . .                   | VTG6GVP . . . . .                    |
| AAAR7595.1 JPhuGLOX/1-537      | 477 | ARLVFMES . . . . .                                                            | ISAD . . . . .                                                | RKSLTFTT . . . . .                 | . . . . .                                   | PPNGRV . . . . .               | VPVPPGATV . . . . .            | FT . . . . .                         |
| ANJ20632.1 JTrGLOX/1-538       | 478 | ARLVFMES . . . . .                                                            | ISAD . . . . .                                                | RKSLTFTT . . . . .                 | . . . . .                                   | PPNGRV . . . . .               | VPVPPGATV . . . . .            | FT . . . . .                         |
| QCC62349.1 JTrGLOX/31-538      | 478 | ARLVFMES . . . . .                                                            | ISAD . . . . .                                                | RKSLTFTT . . . . .                 | . . . . .                                   | PPNGRV . . . . .               | VPVPPGATV . . . . .            | FT . . . . .                         |
| ANJ20633.1 JTrGLOX/21-539      | 479 | ARLVFMES . . . . .                                                            | ISAD . . . . .                                                | RKSLTFTT . . . . .                 | . . . . .                                   | PPNGRV . . . . .               | VPVPPGATV . . . . .            | FT . . . . .                         |

**Figure S3. Sequence alignment of 11 functionally characterized AA5 enzymes with *Tr*LOx.** EFQ36699.1: aryl alcohol oxidase from *Colletotrichum graminicola*; CAP96757: Raffinose oxidase from *Penicillium rubens*; EFQ27661: aryl alcohol oxidase from *C. graminicola*; EFQ30446: Alcohol oxidase from *C. graminicola*; ELA25906: Alcohol oxidase from *C. fruticola*; XP\_013949912: Glyoxal oxidase from *T. virens*; CAD79488: Glyoxal oxidase from *Ustilago maydis*; AAAR87595: Glyoxal oxidase from *Phanerochaete chrysosporium*; ANJ20632: Glyoxal oxidase 1 from *Trametes cinnabarina*; QCC62349: Glyoxal oxidase 3 from *T. cinnabarina*; ANJ20633: Glyoxal oxidase 1 from *T. cinnabarina*. Residues involved in copper binding are highlighted in red and other residues involved in enzymatic activity and substrate preference are highlighted in green.

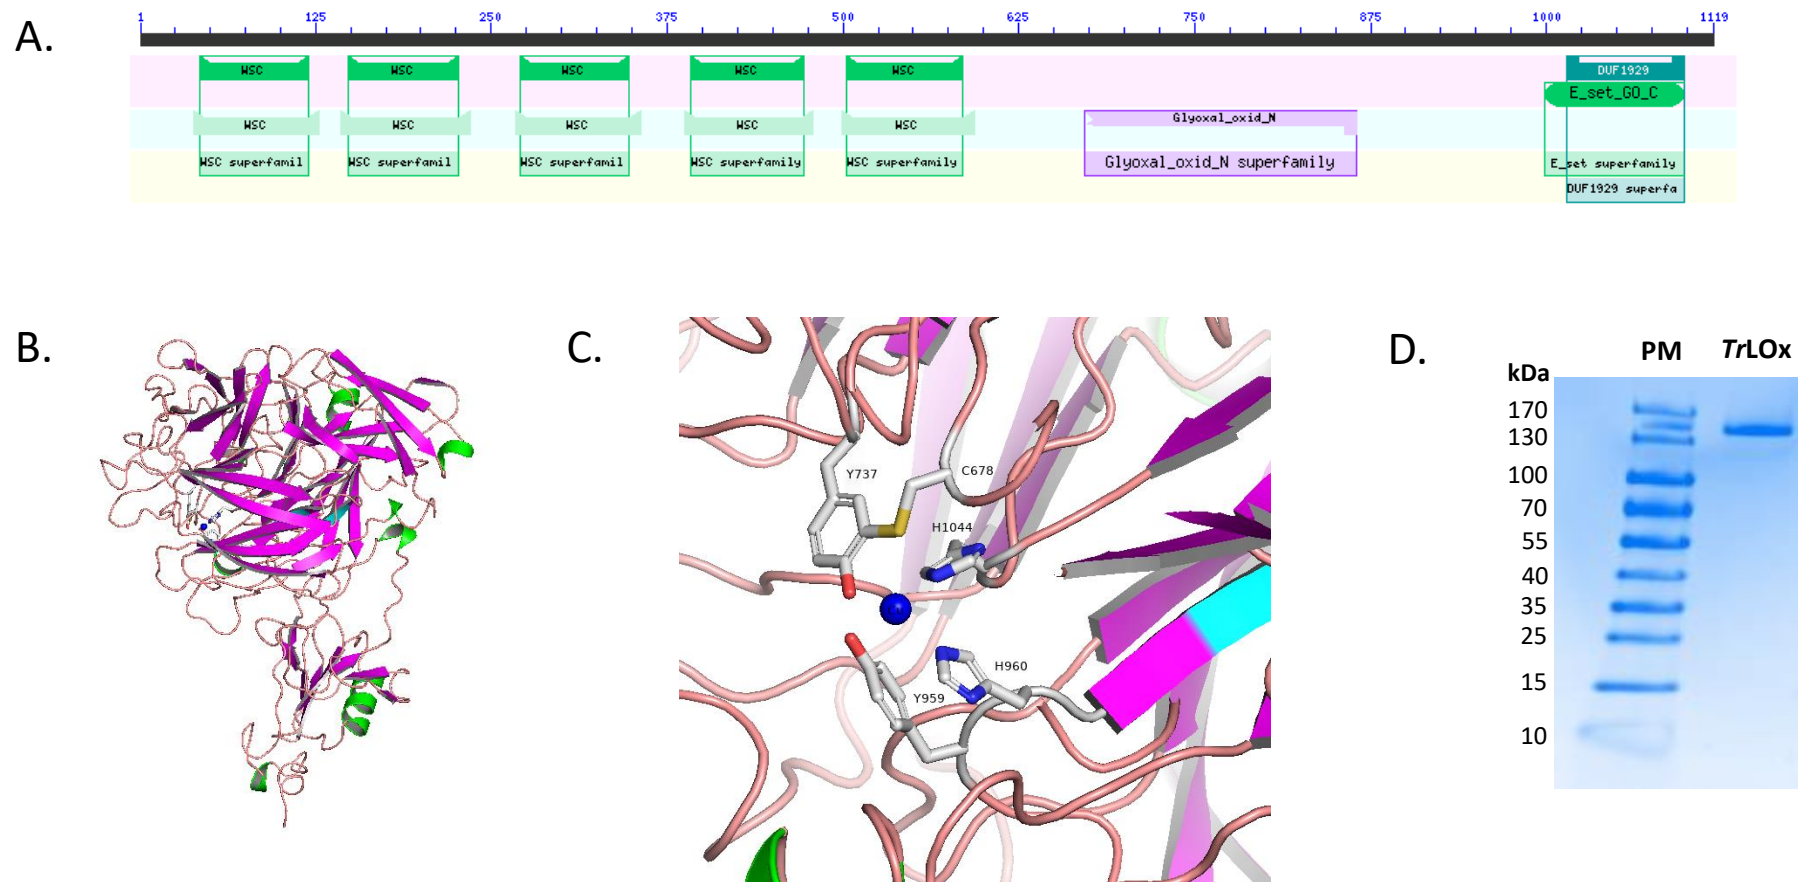

**Figure S4. Structural characteristics of *TrLOx*.** **A.** Predicted domain and functional sites in *TrLOx* encoding sequence. WSC domain: wall stress-responsive component; E\_set\_GO\_C: C-terminal Early set domain associated with the catalytic domain of galactose oxidase at the C-terminal end; DUF1929: Domain of unknown function. **B.** Predicted molecular structure of *TrLOx*. The model was generated using Phyre2 and with copper oxidase from *Colletotrichum graminicola* as template (PDB 6RYX). **C.** The active site of *TrLOx* containing the aromatic residues implicated in copper coordination. **D.** SDS-PAGE gel of purified *TrLOx* protein.

A.

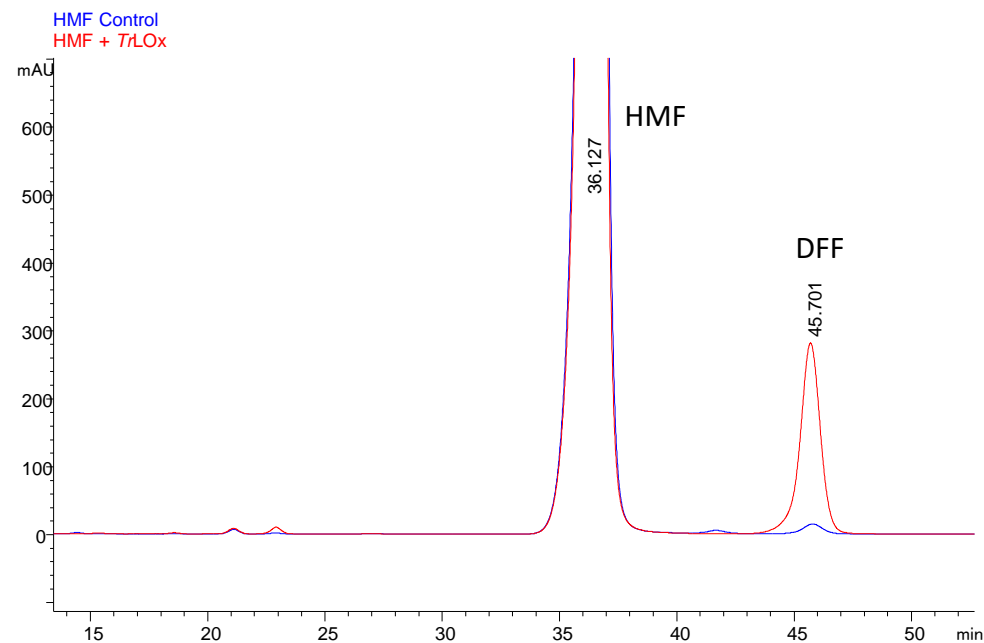

B.

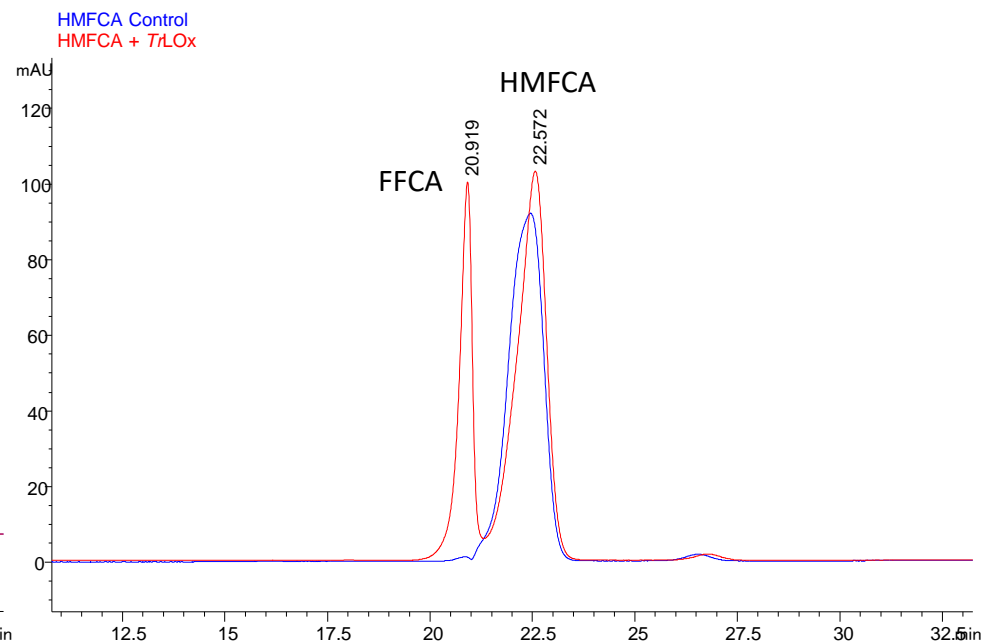

**Figure S5. HPLC analysis of *TrLOx* reactions on A. HMF and B. HMFCA.** The reactions were performed at 30 °C under agitation at 800 rpm over 24 h period in 50 mM tartrate buffer pH 6 and in the presence of 10 µg of enzyme and 5 mM of substrate. Reaction mixtures were separated on Aminex HPX87H column (300 × 7.8 mm) (BioRad) at 45 °C, with 2.5 mM sulfuric acid as the isocratic mobile phase with a flow rate of 0.6 mL/min. Eluted compounds were detected using a diode array detector at 280 nm. The reactions were stopped by incubating the mixture at 90 °C for 10 min and centrifuging at 15,000×g for 15 min. In blue are HMF and HMFCA standards and in red is the reaction with *TrLOx*.

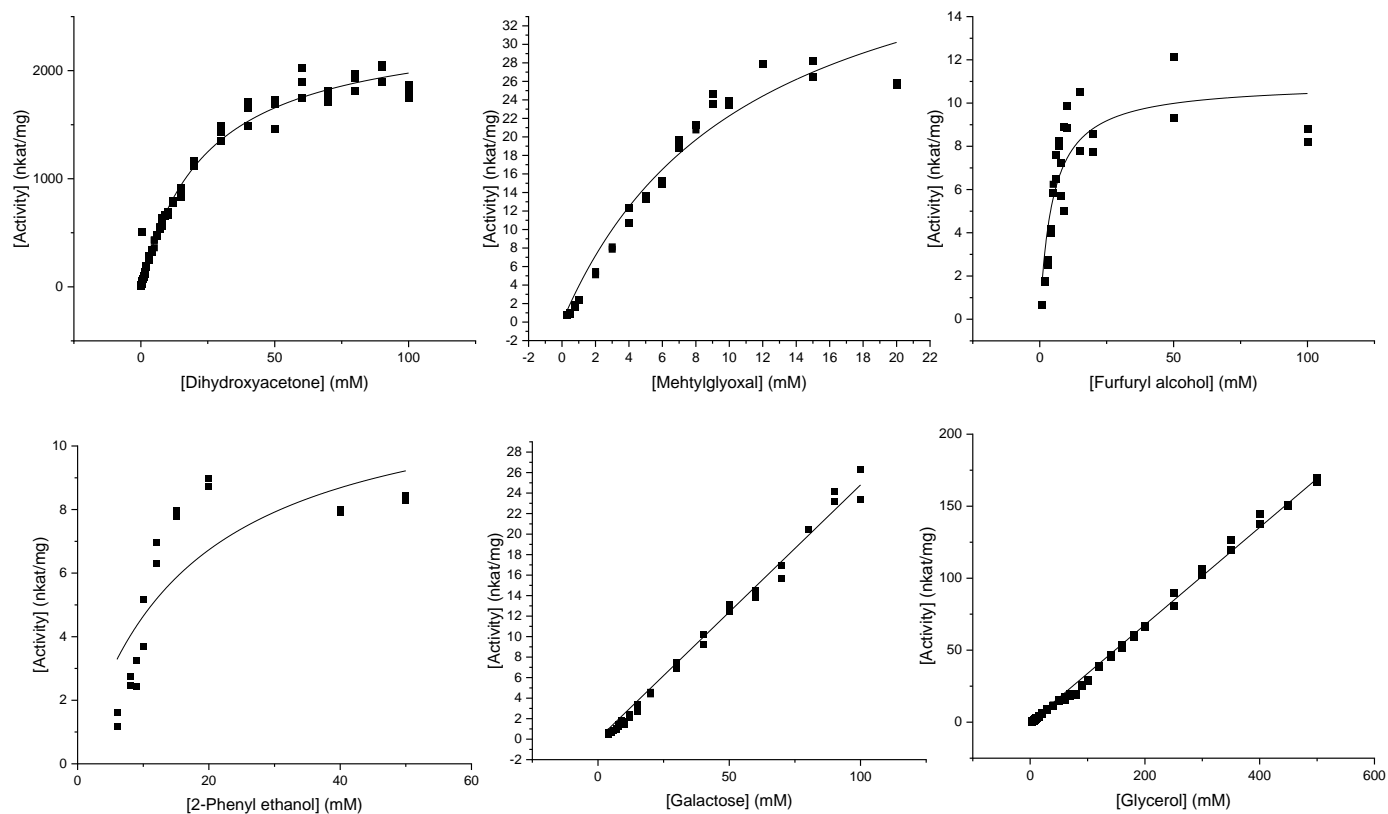

**Figure S6. Michaelis–Menten plots for the activity of *TrLOx* on the different tested substrates.**



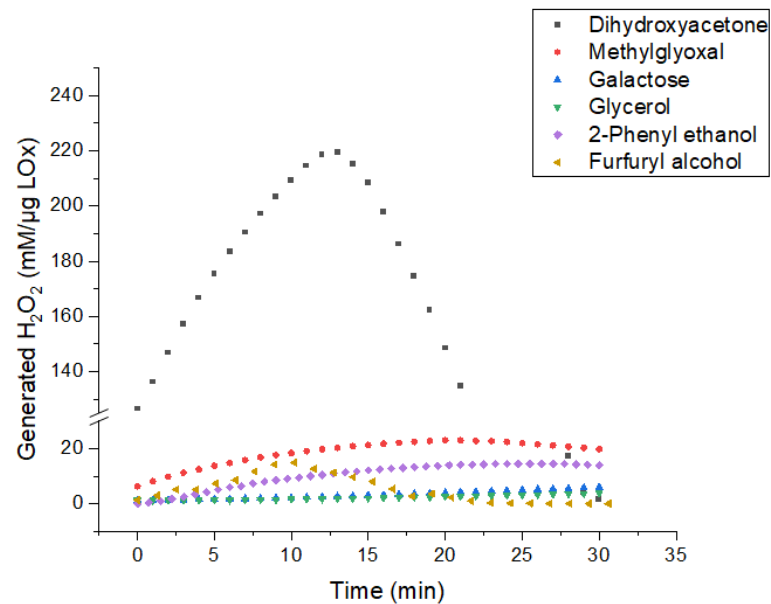

**Figure S7. H<sub>2</sub>O<sub>2</sub> production overtime in the reaction of *TrLOx* on different substrates.** The fluorescence was followed at an excitation wavelength of 560 nm and an emission wavelength of 595 nm. The slope from the standard curve relating H<sub>2</sub>O<sub>2</sub> concentration and fluorescence was used to calculate the amount of generated H<sub>2</sub>O<sub>2</sub> over time (0-20 μM H<sub>2</sub>O<sub>2</sub>; 374.34 counts/μmol).

**A.**

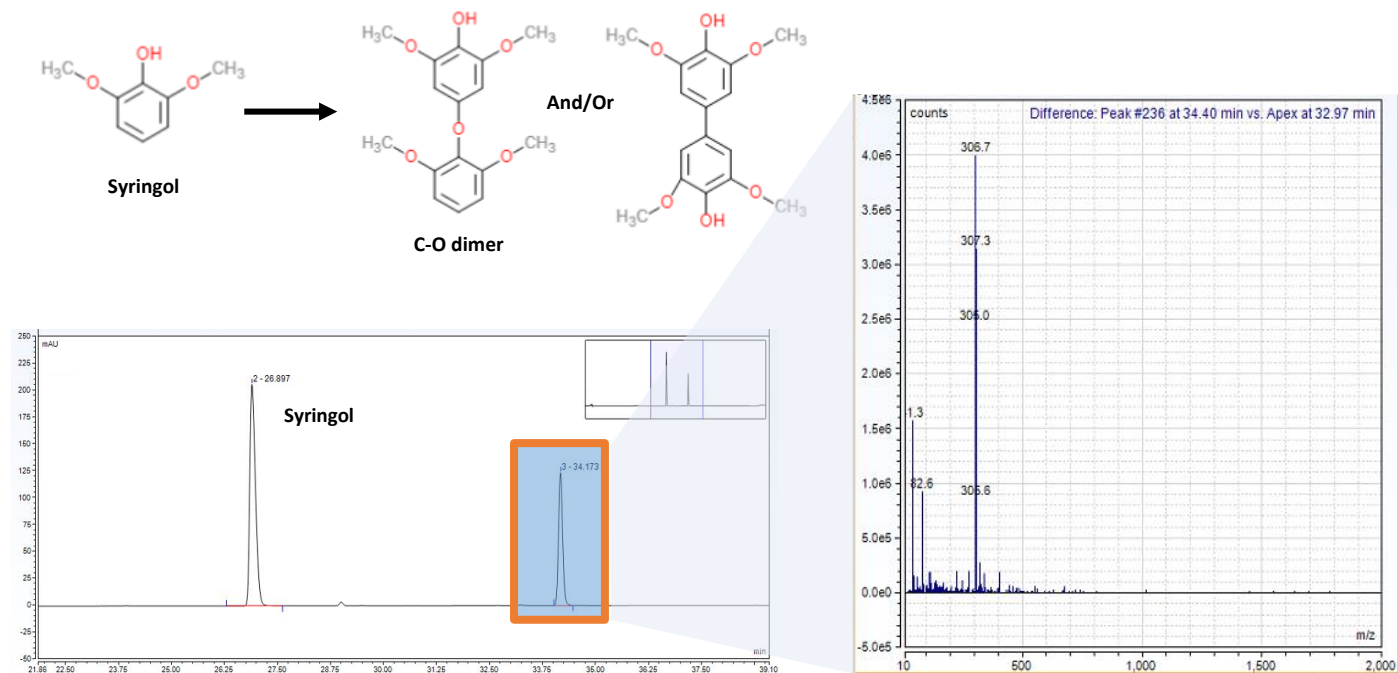

**Figure S8. LC-MS chromatograms of the reaction of TrLOx on A. Syringol and B. Syringyl alcohol.** The molecular weight of the detected product with syringol (306.7) suggest the formation of C-C and/or C-O dimers.

**B.**

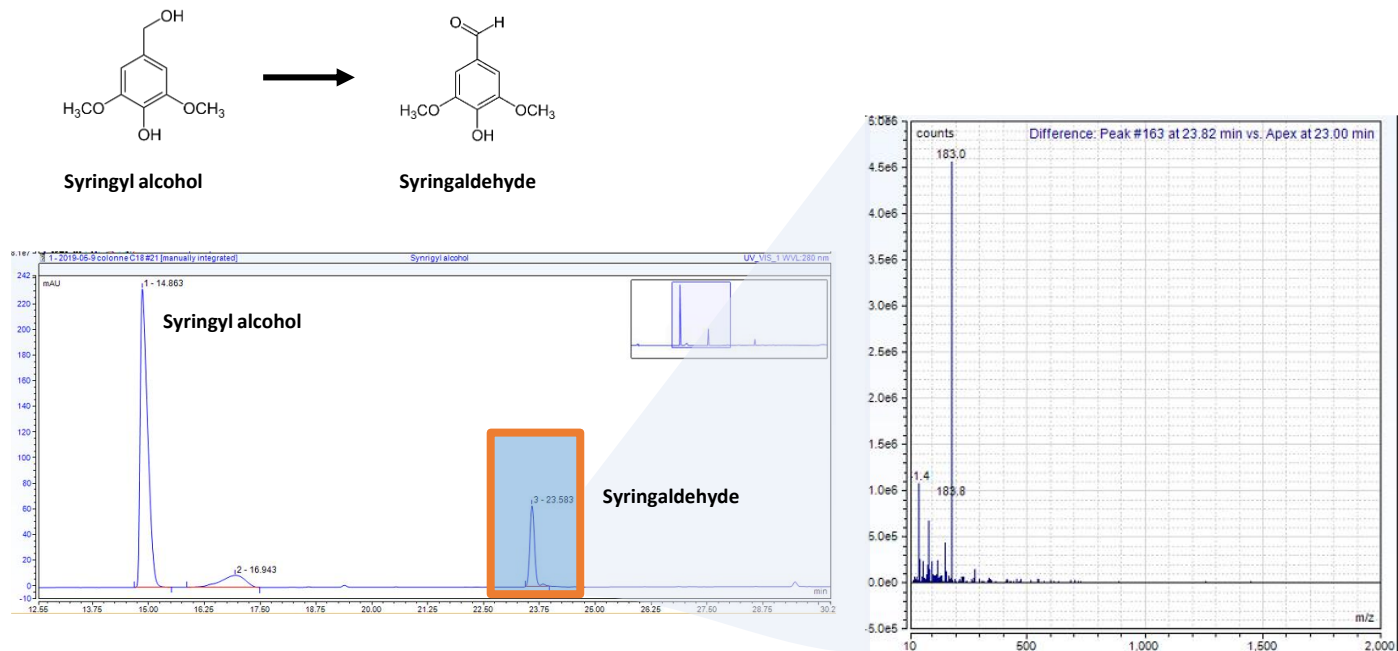

Supplement: s1 [file s1]
